# Supplementary material
Source: Elsevier journal article supplement (https://www.sciencedirect.com/science/article/pii/S2174204920303846)
Supplement: mmc1 [file S2174204920303846:mmc1.docx]

# Supplementary material

| **Supplementary Table 1** EPICHEART study endpoints. |
| --- |
| Coronary artery disease |
| Cardiac computed tomography |
| Coronary artery calcification (coronary calcium score) |
| Invasive coronary angiography |
| Coronary artery stenosis (extent of CAD: obstructive stenosis, significant stenosis; distribution of CAD: number of diseased vessels, and complexity of CAD by SYNTAX score) |
| Postoperative new-onset atrial fibrillation |
| Incidence of in-hospital atrial fibrillation |
| Cardiac remodeling |
| Echocardiography  LA remodeling: LA volume index, LA strain  LV remodeling: LV diastolic dysfunction, LV mass index, strain  Cardiac MRI |
| LA remodeling: LA volume index, LA strain  LV remodeling: late gadolinium, LV mass index  RV remodeling: |
| Frailty |
| Frail, pre-frail, robust |
| CAD: coronary artery disease; LA: left atrial; LV: left ventricular; RV: right ventricular. |
